# Supplementary material for: H3K14 hyperacetylation-mediated c-Myc binding to the miR-30a-5p gene promoter under hypoxia postconditioning protects senescent cardiomyocytes from hypoxia/reoxygenation injury
Source: PubMed Central journal article supplement — Mol Med Rep. 2021 Apr 19;23(6):468. doi: 10.3892/mmr.2021.12107 (PMC8097758; doi:10.3892/mmr.2021.12107), 2021-04-19

Figure S1. Database search analysis of GO 'Biological process' category on Uniprot. HDAC2 was found to be associated with 'histone H3 deacetylation' and histone acetylation sites (H3K14) regulated by HDAC2. HDAC2, histone deacetylase 2; GO, Gene Ontology.

GO-Biological process <sup>1</sup>

- behavioral response to ethanol Source: RGD
- cardiac muscle cell development Source: RGD
- cardiac muscle hypertrophy Source: RGD
- cellular response to dopamine Source: RGD
- cellular response to heat Source: RGD
- cellular response to hydrogen peroxide Source: RGD
- cellular response to retinoic acid Source: RGD
- cellular response to transforming growth factor beta stimulus Source: RGD
- cellular response to trichostatin A Source: RGD
- circadian regulation of gene expression Source: RGD
- dendrite development Source: RGD
- embryonic digit morphogenesis Source: RGD
- epidermal cell differentiation Source: RGD
- eyelid development in camera-type eye Source: RGD
- fungiform papilla formation Source: RGD
- hair follicle placode formation Source: RGD
- hippocampus development Source: RGD
- histone deacetylation Source: RGD
- histone H3 deacetylation Source: RGD
- histone H3-K27 methylation Source: RGD
- histone H4 deacetylation Source: RGD

Child Terms

This table lists all terms that are direct descendants (child terms) of GO:0070932

| Child Term                                                                                                                                                                                                                                                                                                            | Relationship to GO:0070932 |
|-----------------------------------------------------------------------------------------------------------------------------------------------------------------------------------------------------------------------------------------------------------------------------------------------------------------------|----------------------------|
| GO:1990619    histone H3-K9 deacetylation                    | is_a                       |
| GO:0071572    histone H3-K56 deacetylation                   | is_a                       |
| GO:0031078    histone deacetylase activity (H3-K14 specific) | part_of                    |
| GO:1990596    histone H3-K4 deacetylation                    | is_a                       |

Figure S2. Prediction of c-Myc binding sites at the miR-30a-5p gene promoter region. Location of the predicted c-Myc binding sites at the miR-30a-5p gene proximal promoter region. The miR-30a-5p gene promoter (-2000/+71) was analyzed using the JASPAR database, which gave the relative score. Five c-Myc binding sites at the miR-30a-5p gene promoter are highlighted in red text and gray shadow, and the transcriptional start site is labeled. miR, microRNA.

```

>m6_refGene_NR_031843 range=chr9:29541375-29542815 5'pad=0 3'pad=0 strand
=+ repeatMasking=none

-1260 CGGGGGGTTG TAGATTGGAG CTGAGTTTGG GATTGACTCA GCTCTGGGCA
-1210 GCAGTGGTGT ATGAATGCCA AGTGCTAAGC ATGTTTGGAA TGTAGACTTG
                                c-Myc (3.261)
-1160 CCAGCACTGA TAGCGTTTGC TTTGTTCCCC TGTGTGACTT GACCCATTGA
-1110 GAAATTGTGG TTCCTAGGA AGTTTAATA GTTCAAAGTG TTTAGTTAAT
-1060 AAAGAAAATG GCCACAACAT AATCAGCTT GTTTTCACCT GCTGCCTCAA
-1010 AGATTAACCT TCTTAACCAT AATGGGATAG AACTACTTCT TGCTTTGAAA
-960 AAGAAATTTA TGGAGCTCAT CACATTTGTT AGTTTGCACA AACATGAAGC
-910 TCTCTGTGGG GATTTTTTAT CATAAAGTCC TAAGGCATTG GCAACTTAAC
-860 CTTGTGGTA CTTTCATCTAA AGCCAAATCT CAGGGAAAGG CACACCCACT
                                c-Myc (2.312)
-810 TTTCTGTATC AGCTTAATCT TTCACCAGAC TCAGAGGGTT TTGAATTACT
-760 TCAGGAAAAG TAGTGACTGA TAGAGCTTAA CCTTCCGTTT TCCTCATTTA
-710 TTTTCATTAG AGAATGGGAG TGAATTCAG AACATTCAGA TGTGGAGTTA
                                c-Myc (2.005)
-660 ATGTGCGTCA CTGCTGCCAG CCCCTGCTGC CAGCGATAGG TTCTGTGTTT
-610 TTCCAGTGGG AAACCTGAT CCACAGACGA TGCATACAGA CCTGCACCTC
-560 CTTGCTCCTT CTGCTTTTCT CCTGATTGTT ACTTACCCTT TGAAACCTCA
-510 GCTGACTGTA CAAGGCCTCT GTGGAAGCAG ATTCAGAAC AAAGGTGATC
-460 TGTAAGAGTA CCACGTAAGT CTTGTTTCTG TTTCTGTTT TTATTGATAG
-410 TTTTAAGTCT CCCTACTTCT GTGTTTAATG TTGAATGTTG AATGTTCTGT
-360 ACATAATTA AGCATTITTC TAGTTACATT TGCTCAAAGA AGGATTTTGA
                                c-Myc (5.081)
-310 TGAACCTTACA CATGTTGTAG TCCTAGTAAG TCACCTCAC ACTTGCATGA
                                c-Myc (2.147)                                c-Myc (5.019)
-260 TTGTTTCTTG TGGCCAACAA CAGTAAGCCA TTTACATGTG TTGTTTTCAT
                                c-Myc (10.745)
-210 AATATGTTTG AGATAGATAA ATAATAATAA ATGTTCCCTGA AACATATAAA
-160 CTATGTCTTA TATAAGCTCT AGTTATATTC TACTAGGGCA TATCTGAACG
-110 AGGCTTTACA GTTTACAGAA TGTTGCCATT ACATTTTAGA AACACCTACA

```

Figure S3. Expression of c-Myc and HDAC2 in senescent cardiomyocytes. c-Myc and HDAC2 expression levels were measured via reverse transcription-quantitative PCR and western blotting after cells were transfected with three different Ad-shRNAs of c-Myc or HDAC2 in senescent H9C2 cells. Data are presented as the mean  $\pm$  SD from three independent experiments. \* $P$ <0.05 vs. Ad-shNC group. HDAC2, histone deacetylase 2; Ad-, adenovirus; sh, short hairpin RNA; NC, negative control.

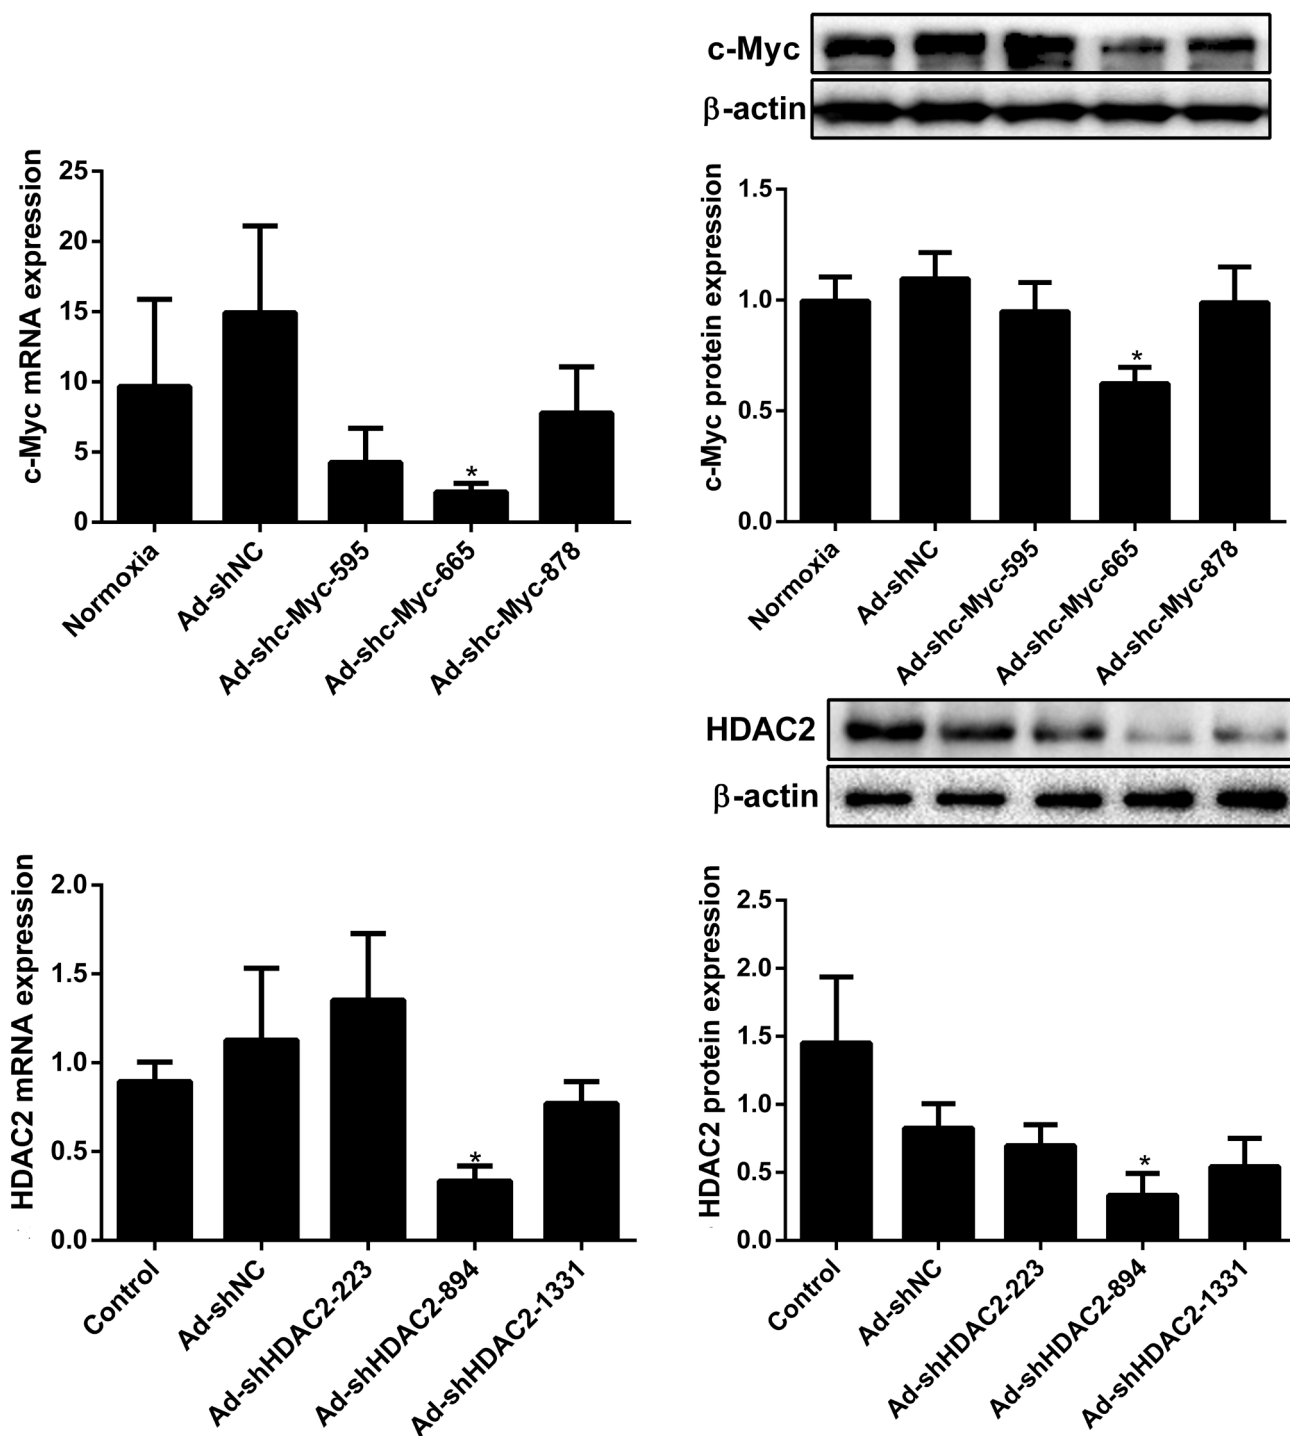

Supplement: Supplementary_Data.pdf [file Supplementary_Data.pdf]
